# Supplementary material
Source: PubMed Central journal article supplement (PMC6550330)

**eFigure 1.** Overview of the study sample and various exclusion criteria.

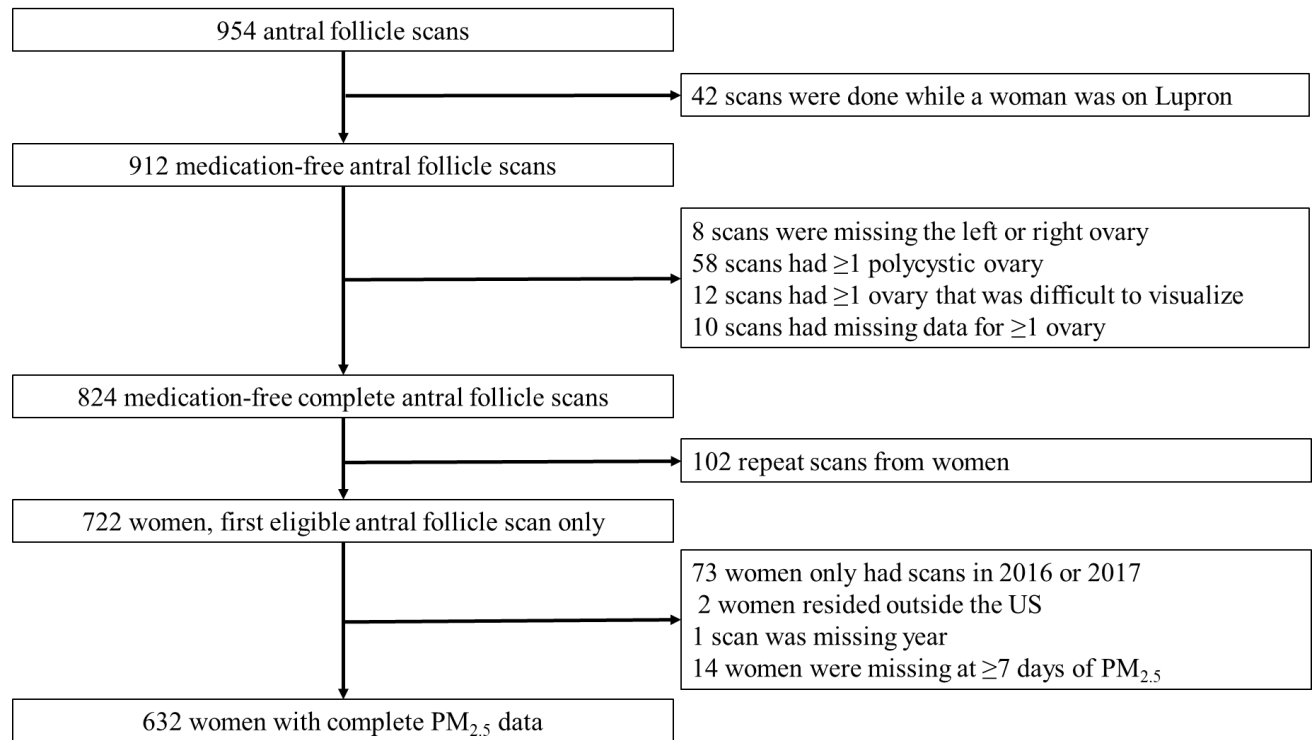

**eFigure 2.** Histogram depicting the distribution of ambient exposure to particulate matter <math><2.5\ \mu\text{m}</math> in diameter ( $\text{PM}_{2.5}$ ) (**Panel A**) and antral follicle counts (AFC) (**Panel B**) among 632 women in the EARTH Study.

A.

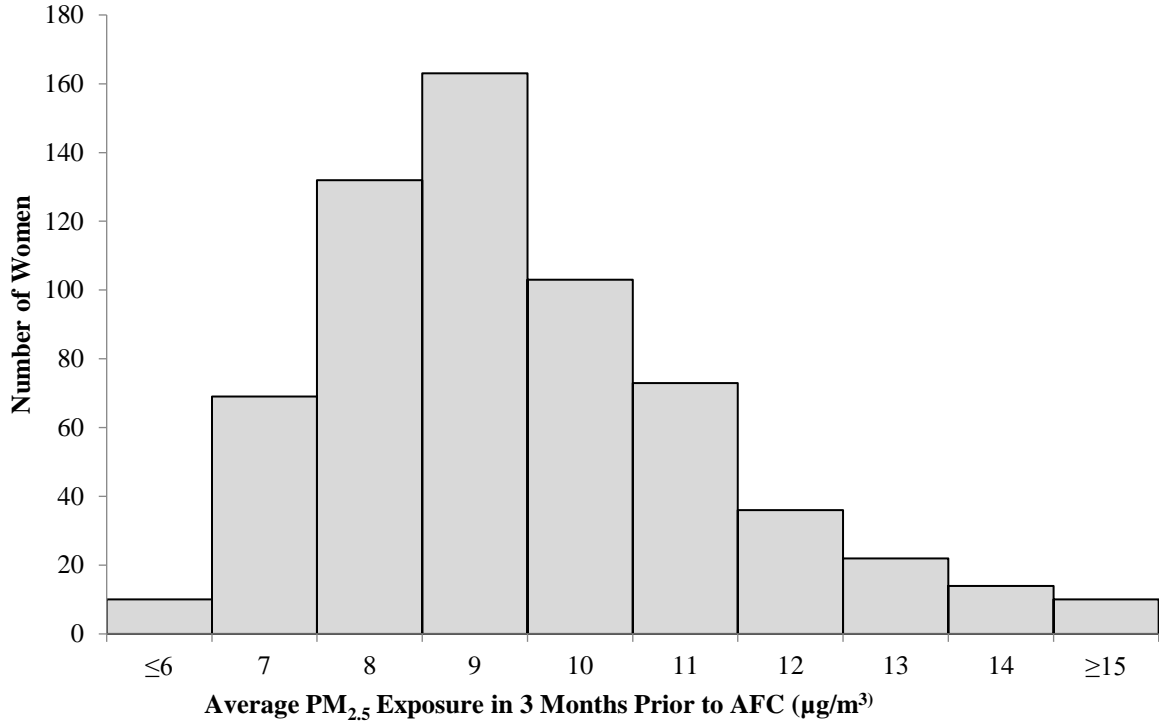

B.

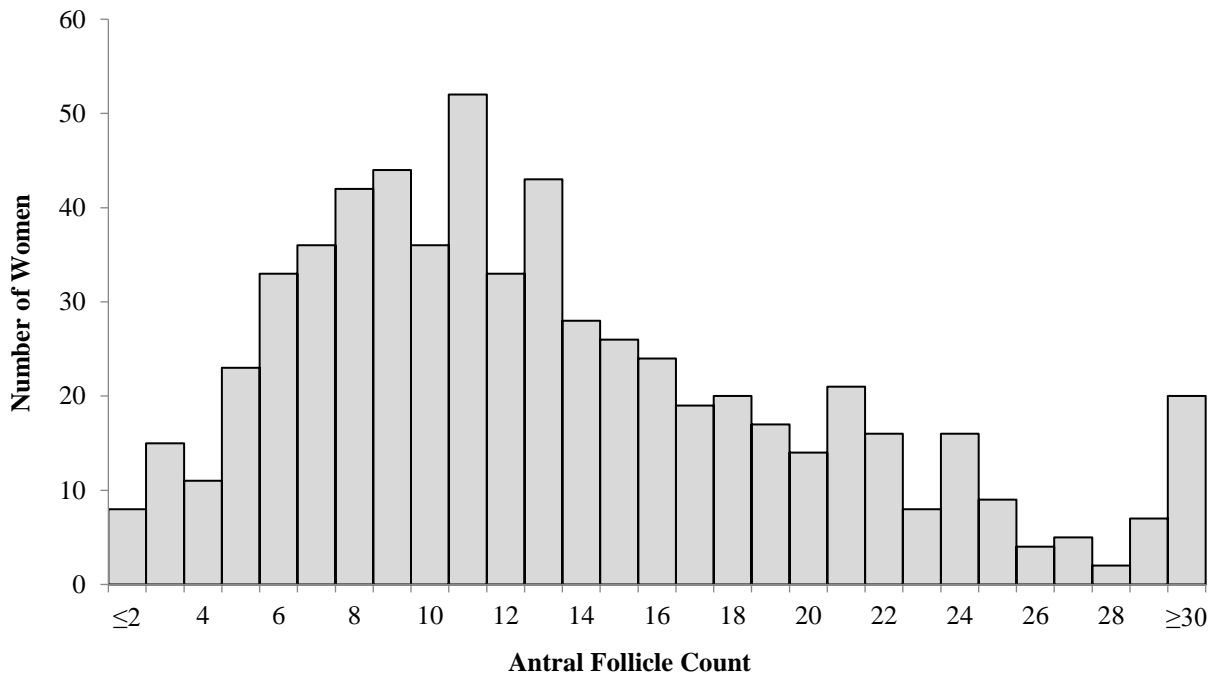

Supplement: NIHMS1526298-supplement-eFigures_1___2.pdf [file NIHMS1526298-supplement-eFigures_1___2.pdf]
